# Supplementary material for: Amino Compound-Synthesized Gold Nanoparticles for SARS-CoV-2 Antigen Delivery
Source: MDPI journal article supplement (doi:10.3390/pharmaceutics17091211), 2025-09-17
Supplement: s1 [file pharmaceutics-3845945-supplementary.pdf › pharmaceutics-3845945-supplementary.pdf]

## Supplementary Information

**Table S1.** ICP-OES instrument operating parameters.

| Parameter                              | Operating condition |
|----------------------------------------|---------------------|
| Nebulizer                              | Cross flow          |
| Atomization chamber                    | Glass-Scott         |
| Power (W)                              | 1,400               |
| Refrigerant gas (L min <sup>-1</sup> ) | 13.5                |
| Auxiliary gas (L min <sup>-1</sup> )   | 1.2                 |
| Nebulizing gas (L min <sup>-1</sup> )  | 0.8                 |
| Mode                                   | Axial               |
| Sample capture (L min <sup>-1</sup> )  | 1.0                 |
| Analyte wavelengths (nm)               | Au 267.595          |
| Measurement time (s)                   | 24                  |

**Table S2.** Adsorption kinetics of RBD protein on the different AuNPs.

| Adsorption Time (min) | Nanoparticle                  |                                |                                  |                                |
|-----------------------|-------------------------------|--------------------------------|----------------------------------|--------------------------------|
|                       | AuNP-Citrate<br>C RBD (ug/uL) | AuNP-Cysteine<br>C RBD (ug/uL) | AuNP-Cysteamine<br>C RBD (ug/uL) | AuNP-Arginine<br>C RBD (ug/uL) |
| 0                     | 0.256                         | 0.264                          | 0.261                            | 0.258                          |
| 10                    | 0.251                         | 0.237                          | 0.191                            | 0.132                          |
| 15                    | 0.245                         | 0.217                          | 0.158                            | 0.107                          |
| 20                    | 0.234                         | 0.211                          | 0.132                            | 0.083                          |
| 25                    | 0.225                         | 0.201                          | 0.099                            | 0.072                          |
| 30                    | 0.220                         | 0.191                          | 0.081                            | 0.088                          |
| 35                    | 0.211                         | 0.158                          | 0.053                            | 0.160                          |
| 40                    | 0.192                         | 0.124                          | 0.022                            | 0.189                          |
| 45                    | 0.090                         | 0.135                          | 0.008                            | 0.217                          |
| 50                    | 0.082                         | 0.124                          | 0.008                            | 0.228                          |
| 55                    | 0.070                         | 0.130                          | 0.007                            | 0.233                          |
| 60                    | 0.076                         | 0.133                          | 0.006                            | 0.223                          |

\* Adsorption studies were performed in 1.0 mL test tubes, in a volume of 250 uL, and at a final AuNP concentration of ~7.8 ng/uL.

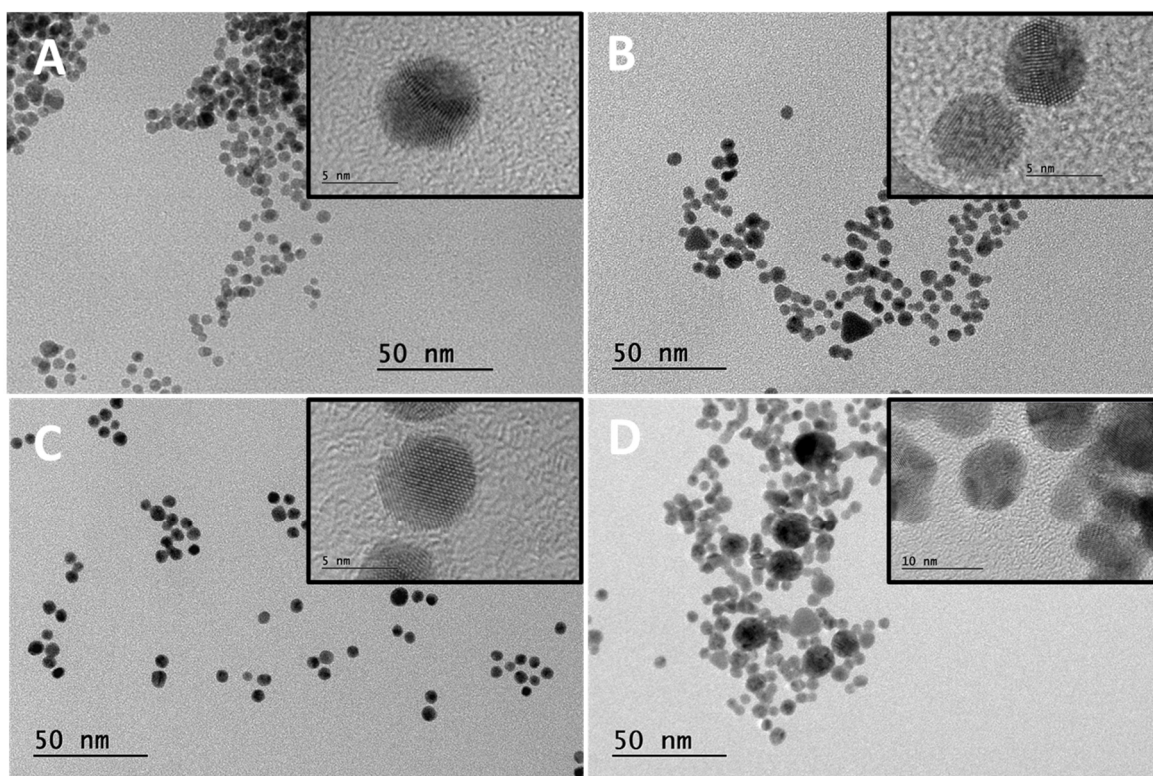

**Figure S1.** Transmission electron microscopy (TEM) of AuNPs synthesized at 80 °C and pH 7.0 using as reducing agent: A) citrate; B) L-cysteine; C) cysteamine and D) arginine. The scale bar is 50 nm for all images.
